# Supplementary material for: High-performance paper-based humidity sensors with Nafion/AgNWs hybrid electrodes
Source: Royal Society of Chemistry journal article supplement (doi:10.1039/d3ra04789j), 2023-01-01
Supplement: d3ra04789j1.pdf [file d3ra04789j1.pdf]

## Supporting Information

### **High-performance paper-based humidity sensors with tightly embedded Nafion/AgNWs electrodes**

Yujun Ji<sup>a, ‡</sup>, Gangqiang Tang<sup>a, ‡</sup>, Chun Zhao<sup>a</sup>, Xin Zhao<sup>a</sup>, Dong Mei<sup>a</sup>, Yifan Pan<sup>a</sup>, and  
Yanjie Wang<sup>a, \*</sup>

<sup>a</sup> *Jiangsu Provincial Key Laboratory of Special Robot Technology, Hohai University,  
Changzhou campus, Changzhou, 213022, China*

*\* Corresponding authors: Yanjie Wang, Email: yjwang@hhu.edu.cn*

*‡ These authors contributed equally: Yujun Ji, Gangqiang Tang.*

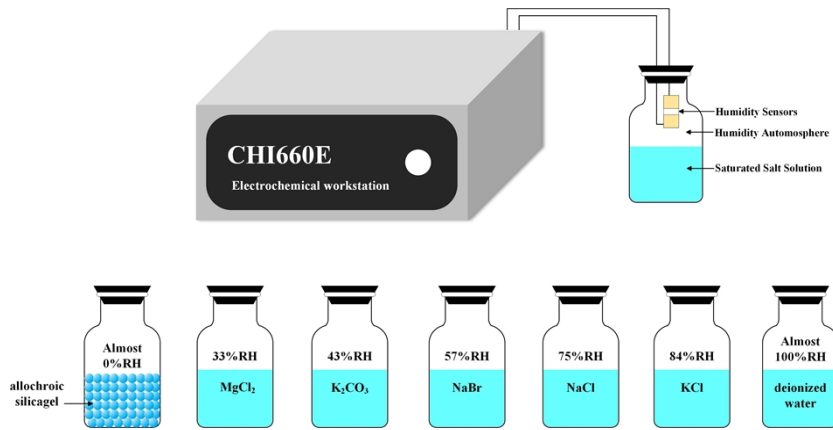

**Figure S1.** Schematic diagram of the measurement setup.

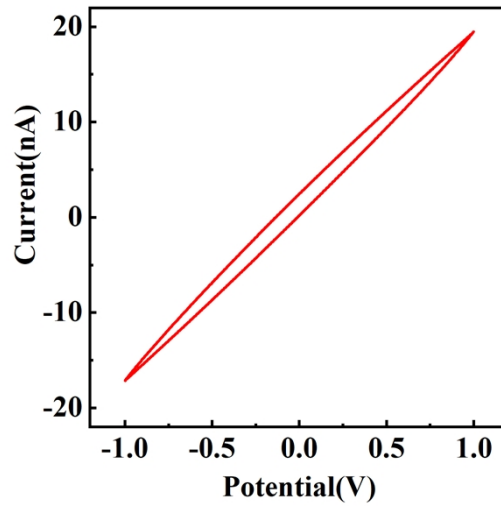

**Figure S2.** The CV curve of the sensor.

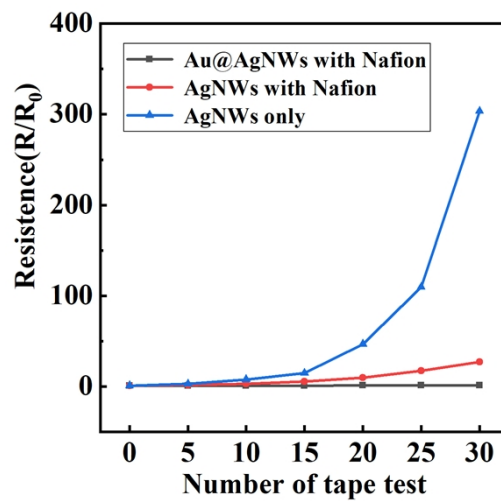

**Figure S3.** The investigation of adhesion force between the electrodes and the filter paper via repeating sticking-peeling test by M&G tape.

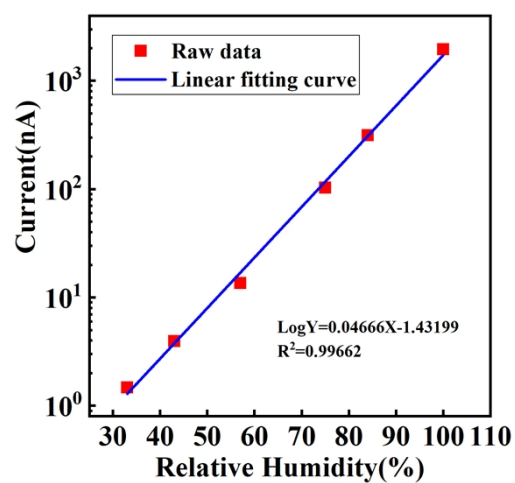

**Figure S4.** The linear fitting curve of current and relative humidity.

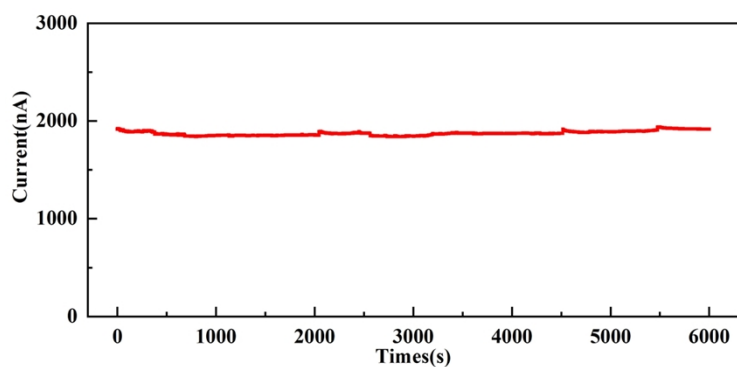

**Figure S5.** Response curve of the sensor at 100% RH for 6000s.

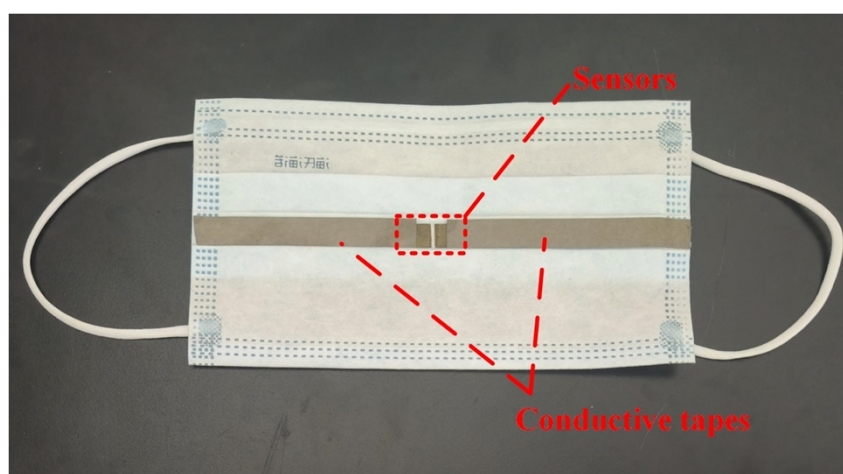

**Figure S6.** Sensors installed on a mask for humidity detection, where electrodes are extended via conductive tapes.
